# Supplementary material for: Safety and Feasibility of the OmniPod Hybrid Closed-Loop System in Adult, Adolescent, and Pediatric Patients with Type 1 Diabetes Using a Personalized Model Predictive Control Algorithm
Source: PubMed Central journal article supplement — Diabetes Technol Ther. 2018 Apr 1;20(4):257–62. doi: 10.1089/dia.2017.0346 (PMC5910038; doi:10.1089/dia.2017.0346), 2018-04-01
Supplement: Supp_Figures1-4.pdf [file Supp_Figures1-4.pdf]

## Supplementary Data

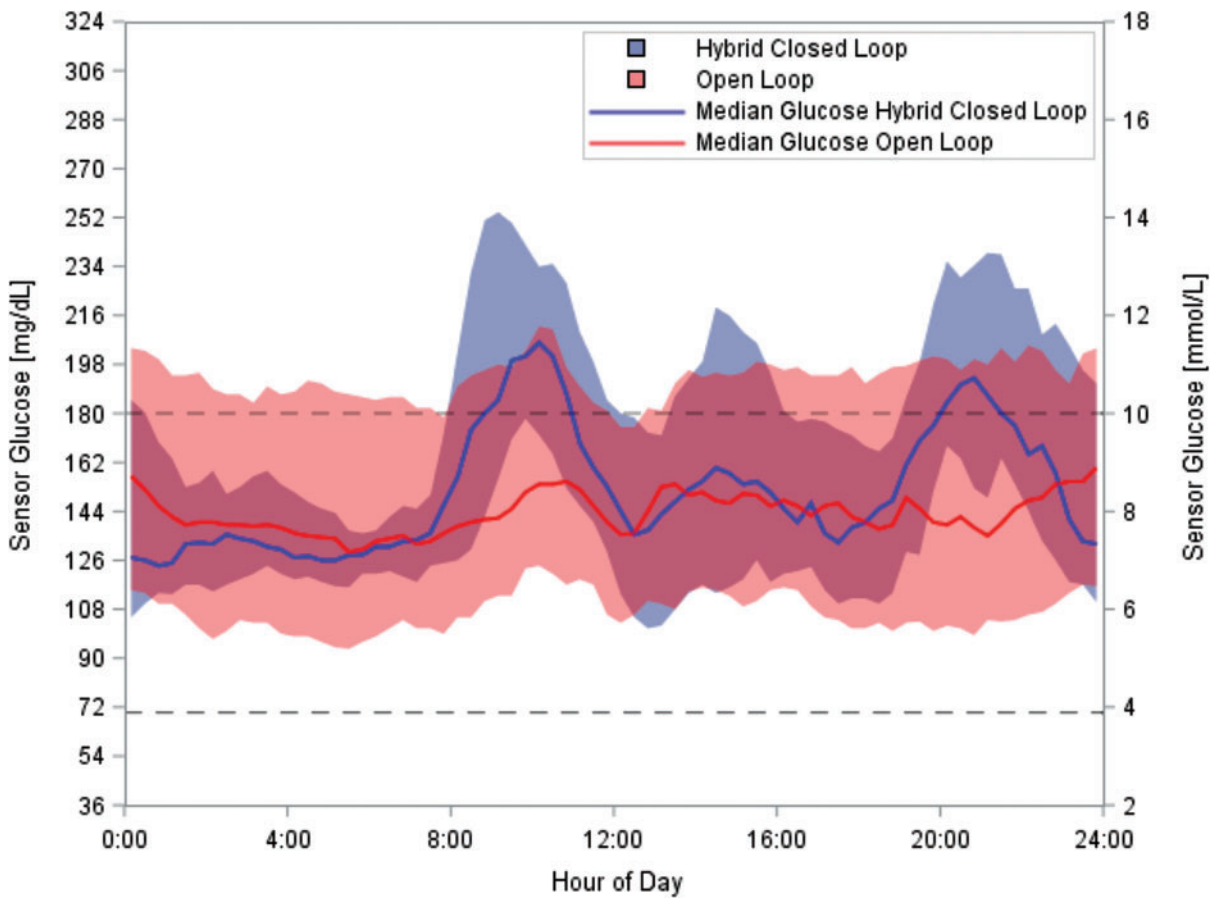

**SUPPLEMENTARY FIG. S1.** Sensor glucose profiles by time of day for 24 adult subjects during the 36-h hybrid closed-loop phase with 80% meal bolus (blue), with data from 1 week of open-loop sensor-augmented pump therapy shown as comparison (red). The data are presented as median (line) and interquartile range (shaded area) of sensor glucose per time of day across all subjects and days. The target range of 70–180 mg/dL is indicated by black dashed lines.

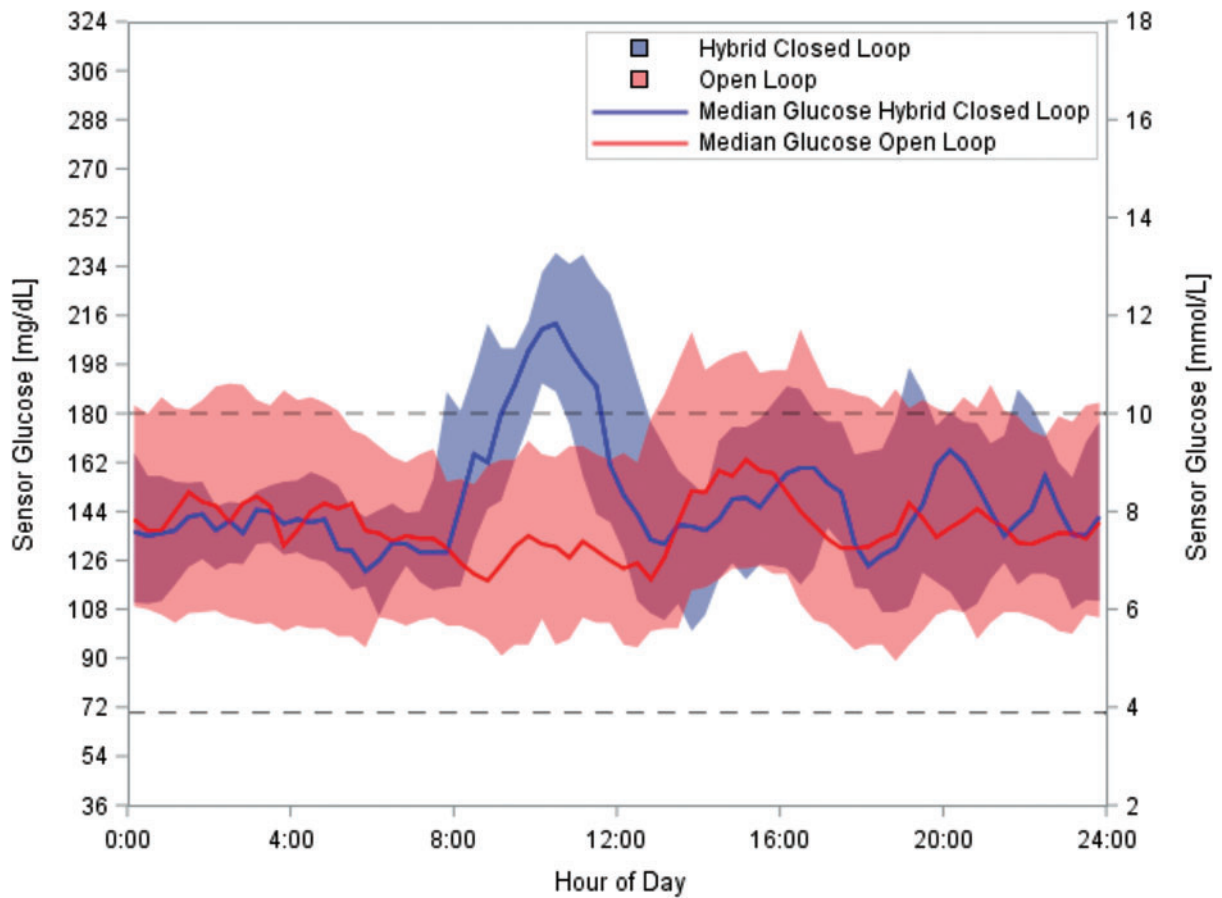

**SUPPLEMENTARY FIG. S2.** Sensor glucose profiles by time of day for 10 adult subjects during the 36-h hybrid closed-loop phase with 100% meal bolus (blue), with data from 1 week of open-loop sensor-augmented pump therapy shown as comparison (red). The data are presented as median (line) and interquartile range (shaded area) of sensor glucose per time of day across all subjects and days. The target range of 70–180 mg/dL is indicated by black dashed lines.

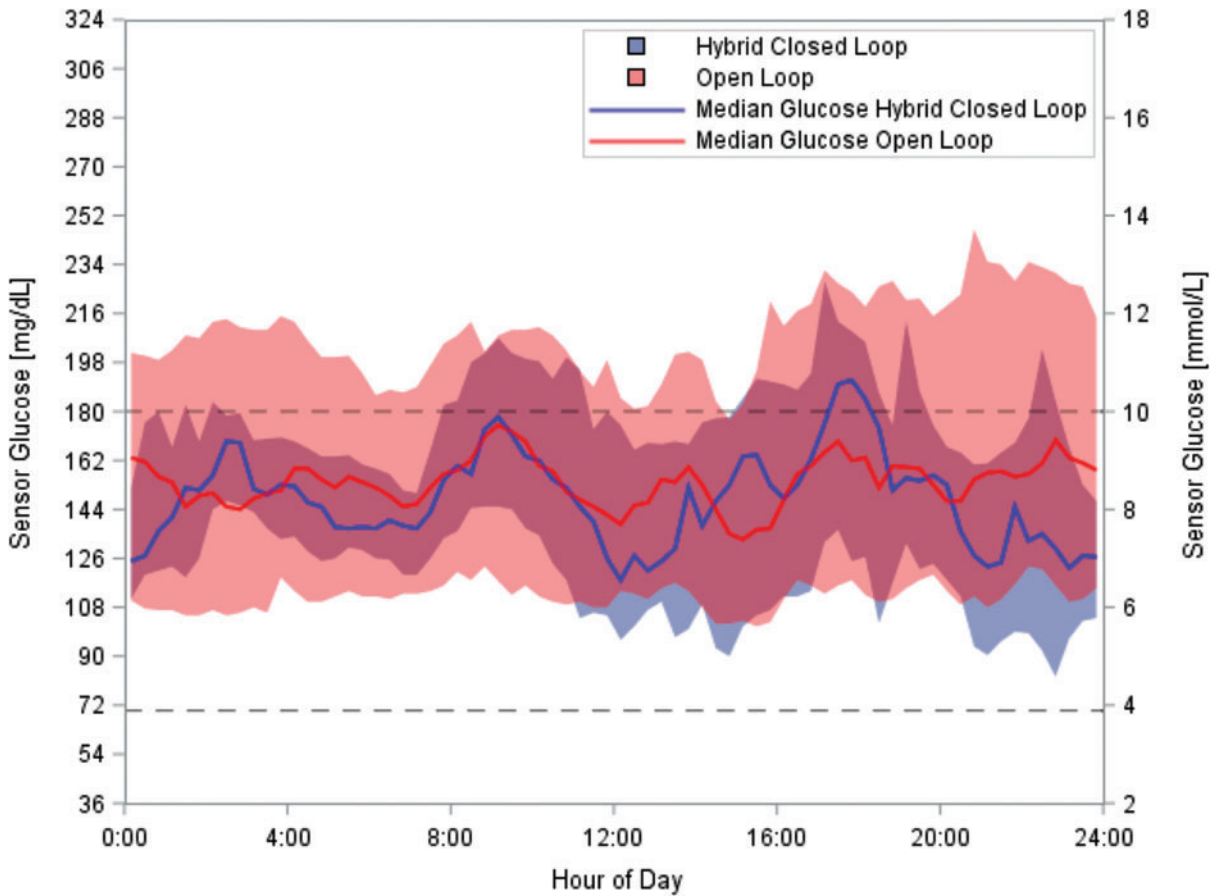

**SUPPLEMENTARY FIG. S3.** Sensor glucose profiles by time of day for 12 adolescent subjects during the 36-h hybrid closed-loop phase with 100% meal bolus (blue), with data from 1 week of open-loop sensor-augmented pump therapy shown as comparison (red). The data are presented as median (line) and interquartile range (shaded area) of sensor glucose per time of day across all subjects and days. The target range of 70–180 mg/dL is indicated by black dashed lines.

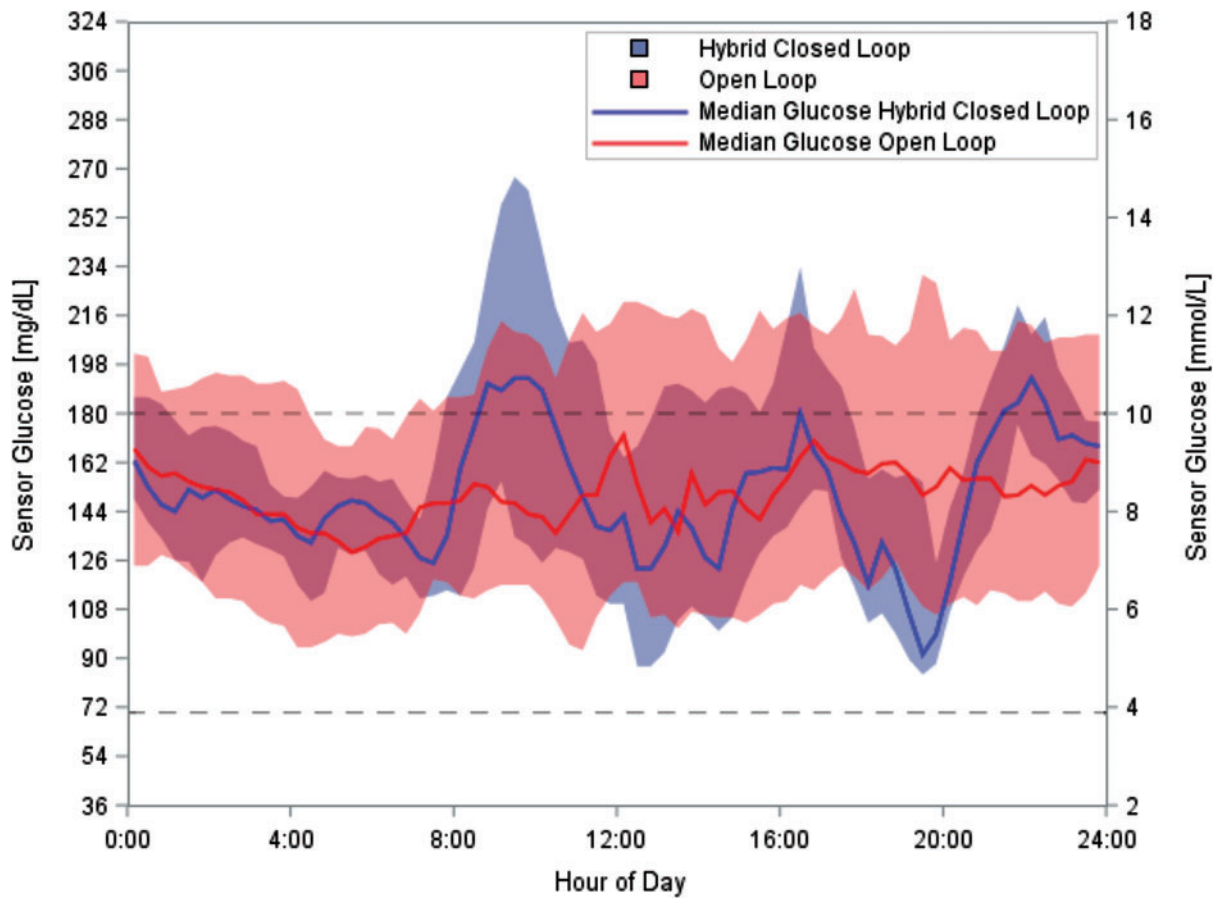

**SUPPLEMENTARY FIG. S4.** Sensor glucose profiles by time of day for 12 pediatric subjects during the 36-h hybrid closed-loop phase with 100% meal bolus (blue), with data from 1 week of open-loop sensor-augmented pump therapy shown as comparison (red). The data are presented as median (line) and interquartile range (shaded area) of sensor glucose per time of day across all subjects and days. The target range of 70–180 mg/dL is indicated by black dashed lines.
